# Supplementary material for: Mobilization of endocannabinoids by midbrain dopamine neurons is required for the encoding of reward prediction
Source: Nat Commun. 2023 Nov 20;14:7545. doi: 10.1038/s41467-023-43131-3 (PMC10662422; doi:10.1038/s41467-023-43131-3)
Supplement: Supplementary file 4 — Source Data [file 41467_2023_43131_MOESM4_ESM.xlsx]

## Sheet: Fig.1F-H
Fig. 1f					Fig. 1g					Fig. 1h
PR active presses					PR breaking points (BP)					PR rewards
WT		DGLa cKO			WT		DGLa cKO			WT		DGLa cKO
count	sex	count	sex		BP	sex	BP	sex		count	sex	count	sex
1265	male	1088	male		219	male	178	male		19	male	18	male
908	male	1094	male		178	male	178	male		18	male	18	male
3939	male	454	male		603	male	95	male		24	male	15	male
1704	male	420	male		268	male	77	male		20	male	14	male
1324	male	1323	male		219	male	219	male		19	male	19	male
1357	male	1363	male		219	male	219	male		19	male	19	male
3939	male	1092	male		603	male	178	male		24	male	18	male
1715	male	708	male		328	male	118	male		21	male	16	male
2355	male	276	male		402	male	50	male		22	male	12	male
1692	male	1276	male		268	male	219	male		20	male	19	male
3873	male	440	male		603	male	77	male		24	male	14	male
2099	male	289	male		328	male	62	male		21	male	13	male
2489	male	1525	male		402	male	268	male		22	male	20	male
2076	male	1061	male		328	male	178	male		21	male	18	male
3024	male	511	male		492	male	95	male		23	male	15	male
1700	male	1742	male		268	male	328	male		20	male	21	male
1919	male	361	male		328	male	77	male		21	male	14	male
1510	female	1742	male		268	female	328	male		20	female	20	female
2005	female	361	male		328	female	77	male		21	female	20	female
1359	female	1554	female		219	female	268	female		19	female	18	female
1510	female	1482	female		328	female	268	female		21	female	16	female
2005	female	1080	female		268	female	178	female		20	female	19	female
1359	female	703	female		328	female	118	female		21	female	18	female
2064	female	1160	female		219	female	219	female		19	female	13	female
2806	female	953	female		328	female	178	female		21	female	17	female
2012	female	339	female		402	female	62	female		21	female	16	female
1510	female	728	female		328	female	145	female		23	female	18	female
1273	female	682	female		492	female	118	female		21	female	21	female
1287	female	996	female		328	female	178	female		25	female	17	female
1989	female	1971	female		737	female	328	female		20	female	18	female
2095	female	740	female		268	female	145	female		19	female	19	female
4721	female	935	female		219	female	178	female		19	female	18	female

## Sheet: Fig.1I-L
Fig. 1i					Fig. 1j					Fig. 1k					Fig. 1l
Bodyweight					Sucrose feeding test					Open field test					Open field test
WT		DGLa cKO			WT		DGLa cKO			WT		DGLa cKO			WT		DGLa cKO
g	sex	g	sex		sucrose eaten (g)	sex	sucrose eaten (g)	sex		Distance (m)	sex	Distance (m)	sex		Velocity (cm/s)	sex	Velocity (cm/s)	sex
21.3	male	24.3	male		0.2	male	0.4	male		74.675	male	5.64369	male		8.4257	male	3.3058	male
23.8	male	29.8	male		0.9	male	0.2	male		43.0787	male	70.5724	male		4.9719	male	8.1245	male
22	male	20.9	male		0.3	male	0.7	male		55.8087	male	43.3057	male		6.9029	male	4.8847	male
21.6	male	21	male		0.905	male	0.295	male		51.4466	male	52.6066	male		5.8006	male	5.978	male
23.5	male	18.7	female		0.408	male	0.3	female		60.2581	male	66.014	female		6.8382	male	7.368	female
24.8	male	18.5	female		0.4	male	0.405	female		56.2156	male	56.3161	female		6.2822	male	6.5895	female
19.5	female	16	female		0.8	female	0.305	female		15.7311	female	57.7689	female		1.7502	female	6.4979	female
18.7	female	18.7	female		0.4	female	0.205	female		43.7162	female	59.3984	female		4.9294	female	6.7312	female
16.4	female				0.305	female				55.2407	female				6.2303	female
21.3	female				0.405	female				68.2128	female				7.7395	female

## Sheet: Fig. 2A-K
Fig. 2a							Fig. 2b							Fig. 2c							Fig. 2d
FR1 (non-cued) active presses							FR1 (non-cued) inactive presses							PR rewards							PR active presses
WT		SHAM		DGLa cKO			WT		SHAM		DGLa cKO			WT		SHAM		DGLa cKO			WT		SHAM		DGLa cKO
count	sex	count	sex	count	sex		count	sex	count	sex	count	sex		count	sex	count	sex	count	sex		count	sex	count	sex	count	sex
143	male	105	male	73	male		30	male	21	male	0	male		25	male	23	male	19	male		3921	male	2548	male	1085	male
103	male	84	male	58	male		30	male	1	male	1	male		28	male	22	male	22	male		4708	male	2258	male	1372	male
60	male	243	male	112	male		31	male	21	male	7	male		23	male	28	male	20	male		2986	male	5281	male	1330	male
30	male	91	female	361	male		8	male	24	female	203	male		25	male	26	female	22	male		2354	male	3091	female	2198	male
246	male	120	female	173	female		33	male	2	female	0	female		18	male	23	female	22	female		1039	male	2669	female	2266	female
139	male	183	female	113	female		41	male	33	female	0	female		27	male	27	female	22	female		6133	male	3379	female	1927	female
81	male			86	female		17	male			1	female		29	female			18	female		5419	female			1060	female
86	female			101	female		48	female			18	female		17	female			22	female		838	female			1993	female
140	female						71	female						26	female						5567	female
84	female						30	female						20	female						1410	female
187	female						20	female						25	female						4462	female
101	female						22	female
Fig. 2e					Fig. 2f					Fig. 2g				Fig. 2h							Fig. 2i								Fig. 2j				Fig. 2k
Representative PR lever-pressing bursts					PR inter-response interval					PR presses/burst				PR active presses/burst							PR burst duration								PR pressing freq. on burst				Number of bursts per session
WT	SHAM	DGLa cKO			WT	SHAM	DGLa cKO			WT	SHAM	DGLa cKO		WT		SHAM		DGLa cKO			WT		SHAM		DGLa cKO				WT	SHAM	DGLa cKO		WT		SHAM		DGLa cKO
timestamps (s)	timestamps (s)	timestamps (s)		Bin Center (s)	p(total)	p(total)	p(total)		Bin Center (count)	p(total)	p(total)	p(total)		avg.	sex	avg.	sex	avg.	sex		sec	sex	sec	sex	sec	sex		Bin Center (Hz)	p(total)	p(total)	p(total)		sec	sex	sec	sex	sec	sex
1033.6	1040.6	1040.1		0.2	0.0930864	0.129512	0.098021		0	0	0	0		9.44954	male	34.2838	male	38.6429	male		13.9752	male	24.3676	male	53.7321	male		0	0	0	0		109	male	74	male	28	male
1034.2	1041	1040.6		0.3	0.27025	0.262594	0.218991		1	0	0	0		64.4861	male	42.4151	male	42.5312	male		41.325	male	52.4755	male	32.2469	male		0.2	0.0447928	0.0229885	0.0451128		72	male	53	male	32	male
1034.6	1041.6	1040.9		0.4	0.235444	0.200053	0.183685		2	0.0522152	0.0858369	0.0738636		46.5714	male	58.4615	male	40.1212	male		51.0786	male	33.9231	male	39.7424	male		0.4	0.0772676	0.0718391	0.109023		84	male	52	male	33	male
1034.8	1042.1	1041.6		0.5	0.148009	0.131099	0.133978		3	0.0759494	0.0686695	0.0852273		65.439	male	55.7818	female	179.75	male		46.3634	male	61.7255	female	30.8042	male		0.6	0.0951848	0.117816	0.0977444		82	male	55	female	12	male
1035.1	1042.6	1042		0.6	0.0807476	0.0828375	0.0917031		4	0.0664557	0.0386266	0.0681818		10.0469	male	34.4026	female	44.92	female		23.3344	male	35.3831	female	49.752	female		0.8	0.0985442	0.117816	0.169173		75	male	77	female	50	female
1037.8	1042.9	1042.2		0.7	0.0486556	0.0567235	0.0675462		5	0.0632911	0.0386266	0.0340909		39.6	male	83.3513	female	53.3056	female		43.4893	male	87.4027	female	56.7889	female		1	0.0951848	0.0977011	0.150376		36	male	37	female	36	female
1038.1	1043.2	1042.5		0.8	0.0336868	0.0396668	0.0499861		6	0.0537975	0.0429185	0.0454545		38.9444	male			26.7692	female		40.1472	male			48.5282	female		1.2	0.107503	0.0977011	0.0977444		69	male			39	female
1038.7	1043.5	1043		0.9	0.022747	0.0259818	0.0378147		7	0.0316456	0.00858369	0.0511364		111.454	female			54.7778	female		74.68	female			39.2417	female		1.4	0.0772676	0.0833333	0.0902256		55	female			36	female
1039.3	1043.9	1043.4		1	0.0176548	0.0179162	0.0285236		8	0.0427215	0.0343348	0.0511364		78.8286	female						44.91	female						1.6	0.0974244	0.0948276	0.0789474		70	female
1039.7	1044.5	1043.8		1.1	0.0140455	0.0163295	0.0230419		9	0.0332278	0.0343348	0.0170455		58.5132	female						39.7329	female						1.8	0.0817469	0.0833333	0.0488722		76	female
1040.1	1045.2	1044.3		1.2	0.0114994	0.0128917	0.0241568		10	0.0253165	0.0386266	0.0340909		18.6591	female						26.2636	female						2	0.0671892	0.0402299	0.0150376		44	female
1040.4	1045.6	1044.5		1.3	0.00926107	0.00971837	0.0168169		11	0.039557	0.0214592	0.0113636		37.871	female						35.9145	female						2.2	0.0358343	0.0344828	0.0150376		62	female
1040.9	1046.4	1044.8		1.4	0.00828181	0.00819781	0.0137508		12	0.0300633	0.0171674	0.0113636																2.4	0.0212766	0.0201149	0.0150376
1041.3	1046.8	1045		1.5	0.00663104	0.00647891	0.0119855		13	0.0268987	0.0214592	0.0284091																2.6	0.031355	0.0316092	0.0112782
1041.6	1047.1	1045.4							14	0.00791139	0.0257511	0.0170455																2.8	0.0179171	0.0229885	0.0037594
1042	1049.2	1046							15	0.0221519	0.0257511	0.00568182																3	0.0145577	0.00862069	0.0112782
1042.3	1049.9	1046.9							16	0.028481	0.0257511	0.0170455																3.2	0.00671892	0.00574713	0
1043	1050.2	1047.3							17	0.0189873	0.0171674	0.0284091																3.4	0.00671892	0.00862069	0.0075188
1043.2	1050.5	1048.6							18	0.0158228	0.0386266	0.0113636																3.6	0.00223964	0.00574713	0.0037594
1043.6	1050.8	1049.1							19	0.0110759	0.0128755	0.0227273																3.8	0.0055991	0.00574713	0.0075188
1044.2	1051.7	1049.4							20	0.0221519	0.00858369	0.0340909																4	0.00447928	0.0114943	0.0150376
1044.6	1051.9	1050.3							21	0.0221519	0.0214592	0.0170455																4.2	0.00223964	0.00574713	0.0037594
1044.8	1053.3	1051.3							22	0.0158228	0.0171674	0.0113636																4.4	0.00335946	0	0
1045.3	1053.7	1052.3							23	0.0126582	0.0128755	0.00568182																4.6	0.00223964	0	0
1045.9	1054.5	1052.8							24	0.00949367	0.0171674	0.00568182																4.8	0	0	0
1046.2	1055.4	1053.7							25	0.0158228	0.0128755	0.0113636																5	0.00335946	0.0114943	0.0037594
1046.6	1056.3	1054.1							26	0.0189873	0.0128755	0.00568182
1046.9	1056.8	1054.6							27	0.0189873	0.0128755	0.0113636
1047.2	1057.1	1055.4							28	0.0205696	0.0171674	0.0397727
1047.6	1057.5	1058.3							29	0.00949367	0.00858369	0.0170455
1047.8	1058	1061							30	0.00632911	0.00429185	0.0170455
1048.2	1058.3	1061.3							31	0.0189873	0.0257511	0.0113636
1048.5	1058.7	1061.7							32	0.00316456	0.0128755	0.0113636
1049.1	1059	1062							33	0.0110759	0.00858369	0.00568182
1049.5	1060.5	1062.3							34	0.0189873	0.00429185	0.00568182
1049.8	1060.9	1062.7							35	0.00791139	0.0171674	0.00568182
1050.9	1061.5	1063.1							36	0.0110759	0.0128755	0.0227273
1051.2	1062.1	1063.4							37	0.00632911	0.00858369	0
1051.4	1063.1	1063.8							38	0.00949367	0.0343348	0.00568182
1051.8	1063.9	1064							39	0.00474684	0.00858369	0.0284091
1052.1	1064.5	1064.6							40	0.00791139	0.00429185	0.00568182
1052.4	1064.9	1064.8							41	0.00158228	0.00858369	0.00568182
1052.8	1066.8	1065.1							42	0.0110759	0.0214592	0.00568182
1053.1	1067.3	1065.7							43	0.0110759	0.0171674	0.0170455
1053.5	1067.7	1066							44	0.00632911	0.00858369	0.0227273
1053.8	1068	1066.4							45	0.00632911	0.00858369	0.0284091
1054.2	1068.2	1066.9							46	0.00949367	0.00429185	0.0113636
1054.8	1068.5	1068							47	0.0126582	0.00429185	0.00568182
1055.1	1069	1068.2							48	0.0126582	0.0128755	0.00568182
1055.4	1069.3	1068.9							49	0.00632911	0.0128755	0
1055.9	1070	1069.4							50	0.00474684	0.0214592	0.00568182
1057.2	1070.6	1069.6
1057.4	1071.1	1070.1
1057.7	1071.3	1070.3
1058.4	1071.8	1071.1
1058.6	1072.1	1073.5
1059.1	1073.5	1073.9
1060	1073.7	1074.2
1060.3	1074	1074.6
1060.8	1074.2	1075.6
1061.5	1074.6	1075.9
1061.9	1074.9	1076.9
1062.1	1075.4	1078
1062.6	1075.7	1078.5
1063.1	1077	1079
1063.7	1077.7	1080
1064.1	1134.9	1107
1066.3	1135.2	1107.3
1066.6	1135.6	1107.7
1067	1136.2	1107.9
1067.3	1136.7	1108.2
1067.8	1138.2	1108.5
1068.2	1139.5	1108.9
1068.8	1140	1109.3
1069	1140.3	1109.7
1069.4	1140.8	1110.1
1069.7	1141.2	1110.9
1070	1148	1111.4
1070.3	1149.2	1112.1
1070.6	1149.8	1112.3
1071.2	1151.1	1113.2
1071.7	1151.3	1113.5
1072	1151.8	1113.9
1072.3	1152.6	1114.4
1072.6	1153.3	1114.7
1073.1	1154.1	1115
1073.4	1154.4	1115.3
1073.7	1154.8	1115.6
1073.9	1155	1116.1
1074.2	1155.3	1116.3
1074.7	1155.9	1117.3
1075.3	1156.3	1117.6
1077.2	1156.8	1117.9
1077.7	1157.2	1118.9
1078	1157.5	1119.6
1079.2	1158.4	1119.9
1079.6	1159	1120.1
1080.2	1159.5	1122
1080.7	1159.7	1122.4
1081.2	1160	1122.6
1081.5	1160.3	1123.2
1082	1160.8	1123.8
1082.4	1161.6	1124.3
1094.1	1161.8	1125.3
1094.7	1162.2	1125.5
1095	1162.6	1126.5
1095.4	1162.9	1127.2
1095.7	1163.1	1127.4
1096	1163.6	1127.9
1096.6	1163.8	1128.5
1097	1164.4	1129
1097.6	1164.8	1129.4
1099.2	1165.8	1129.8
1099.7	1166.4	1130.3
1100.2	1167	1131.8
1100.5	1167.4	1132
1100.7	1168.2	1132.4
1101	1168.4	1360.9
1101.4	1169	1361.8
1103.2	1169.2	1362.2
1103.7	1169.5	1362.5
1104.4	1170.3	1363.1
1104.7	1170.9	1363.5
1105	1171.3	1363.9
1105.4	1171.6	1364.8
1105.9	1171.9	1365.1
1106.2	1172.1	1366.6
1106.5	1172.4	1367.6
1106.8	1172.7	1367.8
1107.3	1172.9	1368.1
1107.8	1173.3	1369.5
1108.3	1173.8	1369.8
1108.9	1175	1370.2
1109.4	1175.3	1370.6
1110.2	1175.5	1370.9
1110.6	1176.2	1372
1111.1	1176.4	1372.4
1112	1176.8	1372.6
1112.3	1177	1376.8
1113.3	1177.4	1377.7
1113.9	1177.9	1378
1114.2	1178.2	1378.6
1115.4	1179.6	1379
1115.9	1179.8	1379.2
1116.2	1180.7	1379.8
1116.4	1181.2	1386.1
1117	1181.5	1386.5
1117.4	1182.1	1386.8
1117.7	1182.3	1387.7
1117.9	1182.8	1388.2
1118.5	1183.9
1118.7	1184.3
1119.2	1184.7
1120	1185
1120.2	1185.3
1120.7	1186.1
1121.2	1186.4
1134	1186.6
1134.3	1187.9
1134.6	1188.2
1134.8	1188.7
1135.1	1189.1
1154.4	1189.4
1154.7	1189.6
1155	1189.9
1155.5	1190.2
1155.8	1190.8
1156.1	1191.8
1156.6	1192.1
1157	1192.4
1157.4	1193.1
1157.7	1193.3
1158.1	1193.6
1158.3	1194.8
1158.6	1195.1
1159.6	1195.6
1159.9	1196.1
1160.2	1196.8
1235.6	1197
1235.9	1198.3
1236.3	1198.8
1236.9	1199.1
1237.2	1199.5
1237.4	1199.7
1237.8	1200.3
1238.5	1200.7
1239.1	1201.2
1239.5	1201.5
1239.9	1227.1
1240.3	1227.4
1240.6	1227.7
1240.9	1227.9
1241.2	1229.1
1241.5	1229.4
1241.9	1229.6
1242.1	1229.9
1242.7	1230.2
1243.5	1230.7
1244.1	1230.9
1244.5	1231.3
1244.9	1232
1245.2	1232.2
1245.4	1232.9
1245.7	1233.6
1246	1233.9
1246.4	1234.2
1246.7	1234.5
1247	1234.8
1247.3	1235
1247.9	1236.5
1248.1	1236.8
1248.5	1237.3
1249.5	1237.6
1250	1237.9
1250.3	1238.3
1250.6	1239
1250.8	1239.3
1251	1239.8
1251.5	1240.7
1251.8	1241
1252.1	1241.8
1253.6	1242.1
1254	1242.4
1254.9	1243.1
1255.5	1243.5
1255.7	1244.2
1256	1244.6
1256.3	1244.9
1256.5	1246.5
1256.9	1259.7
1257.2	1261.7
1257.5	1262.7
1257.9	1265.1
1259.3	1265.8
1259.5	1266.1
1259.8	1266.4
1260.3	1269.2
1260.6	1279
1260.9	1317.9
1261.5	1319.4
1261.7	1319.7
1262.1	1320
1262.4	1320.2
1263.1	1320.6
1263.4	1320.9
1264.3	1321.5
1264.9	1321.9
1265.4	1322.4
1265.7	1322.6
1265.9	1323.5
1266.3	1323.8
1267.1	1324
1267.3	1324.2
1267.7	1324.6
1268.1	1324.9
1269.6	1325.2
1269.9	1327.1
1270.5	1327.4
1270.7	1327.7
1271.1	1328.1
1271.4	1328.4
1271.6	1329.3
1272	1329.5
1272.3	1329.8
1273.1	1330.4
1273.6	1333.1
1274.4	1333.6
1274.9	1333.9
1275.2	1334.4
1287.2	1334.8
1287.5	1335.1
1287.8	1335.3
1288.3	1335.8
1288.7	1336
1289	1336.3
1289.3	1336.5
1289.5	1337.7
1289.7	1338.4
1290	1339
1290.4	1339.5
1290.8	1340.1
1292.4	1341
1292.8	1341.2
1293.3	1341.5
1293.6	1342
1294	1342.2
1294.4	1342.6
1294.8	1343.7
1295.2	1343.9
1297.1	1344.5
1297.4	1345.5
1297.6	1345.8
1298.3	1346.1
1298.6	1346.6
1299.2	1347
1299.7	1347.5
1300.2	1348.6
1300.6	1349.4
1300.9	1350
1301.4	1350.3
1302.2	1350.5
1303.5	1351.3
1304	1351.6
1304.3	1352
1304.6	1352.3
1305.2	1352.8
1305.6	1353.7
1305.9	1355.2
1306.6	1355.4
1306.9	1355.7
1307.3	1355.9
1307.6	1356.3
1308.1	1356.7
1308.4	1357.5
1308.8	1358
1309.3	1358.5
1310.7	1358.8
1311.1	1359.3
1311.3	1360.1
1311.6	1360.6
1311.9	1361
1312.4	1361.3
1313.6	1361.6
1314.1	1362.1
1314.4	1366
1314.7	1368.7
1315.4	1369.2
1315.7	1369.7
1317	1370
1317.4	1371.2
1317.7	1371.4
1318
1318.6
1318.9
1320.5
1320.8
1321.2
1321.7
1322
1322.8
1326.2
1326.7
1326.9
1327.2
1327.5
1334.2
1334.6
1334.9
1335.1
1335.7
1337
1337.5
1337.7
1338
1338.9
1339.5
1339.8
1340.1
1340.3
1340.9
1341.7
1342
1342.6
1344.7
1345.1
1346.5
1346.8
1347.2
1347.6
1347.9
1348.2
1348.5
1348.8
1349.2
1349.5
1350
1350.3
1350.8
1351.4
1351.9
1352.3
1352.8
1354.2
1355.2
1355.6
1356
1356.3

## Sheet: Fig. 3C-F
Fig. 3d,e							Fig. 3f
DSE (% baseline)							DSE (% baseline)
WT			DGLa cKO				Pre-Post DSE
Subject	preDSE	postDSE	Subject	preDSE	postDSE		Subject	Ratio
wt_1	116.445	66.0876	cKO_1	101.095	93.7459		wt_1	50.8305
wt_2	99.2428	77.4348	cKO_2	97.75	106.053		wt_2	22.0132
wt_3	101.883	77.2579	cKO_3	90.8244	109.625		wt_3	24.8569
wt_4	101.893	90.015	cKO_4	98.5727	101.754		wt_4	11.99
wt_5	100.153	70.4512	cKO_5	103.374	110.893		wt_5	29.981
wt_6	86.8769	67.9739	cKO_6	100.076	95.4772		wt_6	19.0808
wt_7	99.3911	75.796	cKO_7	101.769	82.0803		wt_7	23.817
wt_8	86.661	80.5372	cKO_8	100.673	114.723		wt_8	6.18143
							cKO_1	7.40376
							cKO_2	-8.36476
							cKO_3	-18.9394
							cKO_4	-3.20517
							cKO_5	-7.57427
							cKO_6	4.63306
							cKO_7	19.8346
							cKO_8	-14.1534

## Sheet: Fig. 3L-O
	Fig. 3l					Fig. 3m							Fig. 3n
	oICSS FR1 (non-cued) active presses					oICSS FR1 (non-cued) max. presses							oICSS VTO (cued) latency
	WT		DGLa cKO			WT			DGLa cKO				WT			DGLa cKO
Session	Subject	count	Subject	count		Subject	active	inactive	Subject	active	inactive		Subject	sec	sex	Subject	sec	sex
1	wt_1	0	cKO_1	2		wt_1	619	20	cKO_1	58	56		wt_1	1.57518	male	cKO_1	12.2233	male
2	wt_1	45	cKO_1	2		wt_2	240	15	cKO_2	93	56		wt_2	4.87982	male	cKO_2	16.9056	male
3	wt_1	350	cKO_1	15		wt_3	403	36	cKO_3	455	16		wt_3	3.01241	male	cKO_3	7.61319	male
4	wt_1	460	cKO_1	22		wt_4	255	41	cKO_4	170	21		wt_4	2.89173	female	cKO_4	4.95556	male
5	wt_1	619	cKO_1	58		wt_5	534	9	cKO_5	584	19		wt_5	2.70435	female	cKO_5	4.23333	male
1	wt_2	11	cKO_2	1					cKO_6	658	7		wt_6	2.54592	female	cKO_6	2.91871	female
2	wt_2	17	cKO_2	47					cKO_7	658	19					cKO_7	8.41818	female
3	wt_2	13	cKO_2	9					cKO_8	579	9					cKO_8	2.63883	female
4	wt_2	90	cKO_2	28					cKO_9	301	2					cKO_9	9.22414	female
5	wt_2	240	cKO_2	93					cKO_10	522	0
1	wt_3	15	cKO_3	2
2	wt_3	4	cKO_3	0
3	wt_3	179	cKO_3	0		Fig. 3o
4	wt_3	209	cKO_3	67		oICSS VTO (cued) presses
5	wt_3	403	cKO_3	455		WT					DGLa cKO
1	wt_4	10	cKO_4	2		Subject	active	omission	inactive	sex	Subject	active	omission	inactive	sex
2	wt_4	12	cKO_4	0		wt_1	47	0	2	male	cKO_1	14	13	9	male
3	wt_4	43	cKO_4	11		wt_2	36	3	10	male	cKO_2	6	19	1	male
4	wt_4	44	cKO_4	13		wt_3	46	0	8	male	cKO_3	30	5	5	male
5	wt_4	255	cKO_4	170		wt_4	44	1	11	female	cKO_4	36	3	7	male
1	wt_5	3	cKO_5	2		wt_5	38	2	5	female	cKO_5	41	1	6	male
2	wt_5	2	cKO_5	0		wt_6	42	1	2	female	cKO_6	46	0	2	female
3	wt_5	278	cKO_5	11							cKO_7	15	12	4	female
4	wt_5	534	cKO_5	13							cKO_8	34	4	3	female
5	wt_5	474	cKO_5	584							cKO_9	19	9	3	female
1			cKO_6	3
2			cKO_6	20
3			cKO_6	580
4			cKO_6	647
5			cKO_6	658
1			cKO_7	1
2			cKO_7	2
3			cKO_7	635
4			cKO_7	654
5			cKO_7	658
1			cKO_8	0
2			cKO_8	226
3			cKO_8	579
4			cKO_8	556
5			cKO_8	248
1			cKO_9	0
2			cKO_9	1
3			cKO_9	0
4			cKO_9	12
5			cKO_9	301
1			cKO_10	9
2			cKO_10	2
3			cKO_10	15
4			cKO_10	522
5			cKO_10	216

## Sheet: Fig. 4C-I
	Fig. 4c								Fig. 4f								Fig. 4g								Fig. 4h							Fig. 4i
	VTO (cued) latency								VTO Δ[DA] - Cue								VTO Δ[DA] - Lever								VTO Δ[DA] - Reward							VTO DA cue/total DA
	WT			DGLa cKO					WT			DGLa cKO					WT			DGLa cKO					WT			DGLa cKO				WT				DGLa cKO
Session	subject	sec	sex	subject	sec	sex		Session	subject	AUC	sex	subject	AUC	sex		Session	subject	AUC	sex	subject	AUC	sex		Session	subject	AUC	sex	subject	AUC	sex		subject	sex	% total DA (1st)	% total DA (last)	subject	sex	% total DA (1st)	% total DA (last)
1	wt_1	2.0136	male	cKO_1	11.7	male		1	wt_1	0.0446	male	cKO_1	-0.1529	male		1	wt_1	0.0181835	male	cKO_1	-0.0650936	male		1	wt_1	0.1981	male	cKO_1	0.1262	male		wt_1	male	38.9361	62.5841	cKO_1	male	17.1105	39.9975
2	wt_1	2.694	male	cKO_1	5.4866	male		2	wt_1	0.102	male	cKO_1	0.1224	male		2	wt_1	0.00979456	male	cKO_1	0.0344548	male		2	wt_1	0.2041	male	cKO_1	0.3029	male		wt_2	male	63.4066	87.0088	cKO_2	male	31.5214	26.4799
3	wt_1	1.3449	male	cKO_1	2.4015	male		3	wt_1	0.1325	male	cKO_1	0.1004	male		3	wt_1	0.0899742	male	cKO_1	0.0432494	male		3	wt_1	0.3021	male	cKO_1	0.2634	male		wt_3	male	48.4698	56.3383	cKO_3	male	26.3078	38.1679
4	wt_1	0.6176	male	cKO_1	3.94405	male		4	wt_1	0.1281	male	cKO_1	0.1004	male		4	wt_1	0.130064	male	cKO_1	0.0310687	male		4	wt_1	-0.0141	male	cKO_1	0.2634	male		wt_4	male	60.2709	60.4518	cKO_4	male	62.3515	45.4338
1	wt_2	1.4015	male	cKO_2	3.017	male		1	wt_2	0.063	male	cKO_2	0.1004	male		1	wt_2	0.0136647	male	cKO_2	0.0366542	male		1	wt_2	-0.059	male	cKO_2	0.4825	male		wt_5	male	52.1442	73.0658	cKO_5	female	46.118	55.298
2	wt_2	3.1214	male	cKO_2	3.1745	male		2	wt_2	0.2548	male	cKO_2	0.0736	male		2	wt_2	-0.0371089	male	cKO_2	0.0311675	male		2	wt_2	-0.2255	male	cKO_2	0.5804	male		wt_6	female	51.9454	73.1382	cKO_6	female	26.9482	34.3272
3	wt_2	2.1167	male	cKO_2	3.09575	male		3	wt_2	0.6358	male	cKO_2	0.0736	male		3	wt_2	0.0338603	male	cKO_2	0.0311675	male		3	wt_2	-0.0969	male	cKO_2	0.5804	male		wt_7	female	61.91	97.4807	cKO_7	female	23.3243	38.7075
4	wt_2	2.2132	male	cKO_2	4.539	male		4	wt_2	0.6358	male	cKO_2	-0.0157	male		4	wt_2	0.00505342	male	cKO_2	0.00886014	male		4	wt_2	-0.0969	male	cKO_2	0.357	male		wt_8	female	26.3078	56.9022	cKO_8	female	13.0486	22.3187
1	wt_3	2.2391	male	cKO_3	11.3158	male		1	wt_3	0.096	male	cKO_3	-0.0867	male		1	wt_3	0.0750503	male	cKO_3	0.0703994	male		1	wt_3	0.1163	male	cKO_3	0.1633	male		wt_9	female	41.8782	70.6419	cKO_9	female	22.2296	24.517
2	wt_3	1.8015	male	cKO_3	10.2871	male		2	wt_3	0.1134	male	cKO_3	0.0281	male		2	wt_3	0.108382	male	cKO_3	0.138161	male		2	wt_3	0.128	male	cKO_3	0.3381	male
3	wt_3	1.5537	male	cKO_3	13.3514	male		3	wt_3	0.1296	male	cKO_3	0.1792	male		3	wt_3	0.153017	male	cKO_3	0.122328	male		3	wt_3	0.0497	male	cKO_3	0.3847	male
4	wt_3	1.6776	male	cKO_3	11.6514	male		4	wt_3	0.1296	male	cKO_3	0.1224	male		4	wt_3	0.227153	male	cKO_3	0.122328	male		4	wt_3	0.0497	male	cKO_3	0.3381	male
1	wt_4	3.9868	male	cKO_4	5.4273	male		1	wt_4	0.2284	male	cKO_4	0.1628	male		1	wt_4	0.0746382	male	cKO_4	0.0638067	male		1	wt_4	0.0737	male	cKO_4	0.00896	male
2	wt_4	4.6083	male	cKO_4	7.6655	male		2	wt_4	0.2477	male	cKO_4	0.0269	male		2	wt_4	0.0525673	male	cKO_4	0.00137832	male		2	wt_4	0.0756	male	cKO_4	0.0853	male
3	wt_4	8.0549	male	cKO_4	8.24808	male		3	wt_4	0.3451	male	cKO_4	0.0269	male		3	wt_4	0.0581581	male	cKO_4	0.00137832	male		3	wt_4	-0.1198	male	cKO_4	0.0853	male
4	wt_4	1.9534	male	cKO_4	7.95679	male		4	wt_4	0.2722	male	cKO_4	-0.0265	male		4	wt_4	0.0581581	male	cKO_4	0.00240531	male		4	wt_4	0.1001	male	cKO_4	0.0135	male
1	wt_5	16.7276	male	cKO_5	15.69	female		1	wt_5	0.3472	male	cKO_5	-5.4e-05	female		1	wt_5	0.113359	male	cKO_5	0.0929262	female		1	wt_5	0.3001	male	cKO_5	0.0379	female
2	wt_5	14.8167	male	cKO_5	8.3841	female		2	wt_5	0.4103	male	cKO_5	0.00819	female		2	wt_5	0.0737485	male	cKO_5	0.12513	female		2	wt_5	0.0562	male	cKO_5	0.3397	female
3	wt_5	6.6839	male	cKO_5	12.0371	female		3	wt_5	0.3639	male	cKO_5	0.00819	female		3	wt_5	0.0529823	male	cKO_5	0.103755	female		3	wt_5	-0.00823	male	cKO_5	0.3397	female
4	wt_5	1.67098	male	cKO_5	14.5722	female		4	wt_5	0.3639	male	cKO_5	0.0965	female		4	wt_5	0.0220711	male	cKO_5	0.103755	female		4	wt_5	-0.00823	male	cKO_5	0.0348	female
1	wt_6	26.6067	female	cKO_6	45.5	female		1	wt_6	0.2271	female	cKO_6	0.1618	female		1	wt_6	0.0929262	female	cKO_6	0.0407997	female		1	wt_6	0.1932	female	cKO_6	0.8244	female
2	wt_6	8.1304	female	cKO_6	35.2917	female		2	wt_6	0.1113	female	cKO_6	0.1365	female		2	wt_6	0.12513	female	cKO_6	0.0371687	female		2	wt_6	-0.1124	female	cKO_6	0.962	female
3	wt_6	4.1361	female	cKO_6	7.213	female		3	wt_6	0.2292	female	cKO_6	0.1625	female		3	wt_6	0.103755	female	cKO_6	0.0723944	female		3	wt_6	-0.0585	female	cKO_6	0.5346	female
4	wt_6	2.06805	female	cKO_6	6.55727	female		4	wt_6	0.2292	female	cKO_6	0.1625	female		4	wt_6	0.103755	female	cKO_6	0.0723944	female		4	wt_6	-0.0585	female	cKO_6	0.5168	female
1	wt_7	2.1167	female	cKO_7	43.1	female		1	wt_7	0.3385	female	cKO_7	0.1531	female		1	wt_7	0.0366806	female	cKO_7	0.0929262	female		1	wt_7	0.1215	female	cKO_7	1.0191	female
2	wt_7	1.7877	female	cKO_7	29.82	female		2	wt_7	0.2782	female	cKO_7	0.1472	female		2	wt_7	0.01559	female	cKO_7	0.12513	female		2	wt_7	0.0952	female	cKO_7	0.3334	female
3	wt_7	2.1167	female	cKO_7	12.1532	female		3	wt_7	0.348	female	cKO_7	-0.0524	female		3	wt_7	0.0621715	female	cKO_7	0.103755	female		3	wt_7	0.1215	female	cKO_7	0.0483	female
4	wt_7	1.05835	female	cKO_7	28.3577	female		4	wt_7	0.6567	female	cKO_7	-0.0524	female		4	wt_7	0.0621715	female	cKO_7	0.103755	female		4	wt_7	-0.2027	female	cKO_7	0.0486	female
1	wt_8	4.2456	female	cKO_8	28.1	female		1	wt_8	-0.0867	female	cKO_8	-0.0373	female		1	wt_8	0.130941	female	cKO_8	0.130941	female		1	wt_8	0.1633	female	cKO_8	1.0286	female
2	wt_8	2.7885	female	cKO_8	8.094	female		2	wt_8	0.0281	female	cKO_8	-0.0163	female		2	wt_8	0.0367393	female	cKO_8	0.0367393	female		2	wt_8	0.3381	female	cKO_8	0.3273	female
3	wt_8	4.2552	female	cKO_8	21.5172	female		3	wt_8	0.1792	female	cKO_8	-0.0163	female		3	wt_8	0.130941	female	cKO_8	0.130941	female		3	wt_8	0.3847	female	cKO_8	0.67795	female
4	wt_8	1.1486	female	cKO_8	4.3086	female		4	wt_8	0.1224	female	cKO_8	-0.0163	female		4	wt_8	0.318865	female	cKO_8	0.372078	female		4	wt_8	0.038	female	cKO_8	0.50263	female
1	wt_9	4.9235	female	cKO_9	45.5	female		1	wt_9	0.2463	female	cKO_9	0.0746	female		1	wt_9	0.0136647	female	cKO_9	0.0750503	female		1	wt_9	0.4293	female	cKO_9	0.8244	female
2	wt_9	4.0293	female	cKO_9	35.2917	female		2	wt_9	0.4172	female	cKO_9	-0.0469	female		2	wt_9	-0.0371089	female	cKO_9	0.108382	female		2	wt_9	0.626	female	cKO_9	0.962	female
3	wt_9	3.2731	female	cKO_9	32.0834	female		3	wt_9	0.4172	female	cKO_9	0.0893	female		3	wt_9	0.0338603	female	cKO_9	0.197274	female		3	wt_9	0.12	female	cKO_9	0.5346	female
4	wt_9	1.2063	female	cKO_9	37.625	female		4	wt_9	0.4172	female	cKO_9	0.0156	female		4	wt_9	0.00505342	female	cKO_9	0.227153	female		4	wt_9	0.0416	female	cKO_9	0.5168	female

## Sheet: Supp. Fig. 2
	Supp. Fig. 2a					Supp. Fig. 2b					Supp. Fig. 2c					Supp. Fig. 2d
	Open field test					Open field test - total					Elevated Plus Maze - closed arms					Elevated Plus Maze - open arms
	WT		SHAM			WT		SHAM			WT		SHAM			WT		SHAM
min	subject	distance (m)	subject	distance (m)		subject	distance (m)	subject	distance (m)		subject	time (s)	subject	time (s)		subject	time (s)	subject	time (s)
5	wt_1	27.5007	sham_1	28.7106		wt_1	184.505	sham_1	206.993		wt_1	225.23	sham_1	277.43		wt_1	47.4	sham_1	6.73
10	wt_1	21.1957	sham_1	23.9539		wt_2	168.047	sham_2	278.418		wt_2	279.87	sham_2	286.07		wt_2	6.73	sham_2	0
15	wt_1	18.8102	sham_1	21.7614		wt_3	242.424	sham_3	248.39		wt_3	272.83	sham_3	279.2		wt_3	7.43	sham_3	3.5
20	wt_1	16.5327	sham_1	19.7078		wt_4	236.718	sham_4	185.192		wt_4	248.27	sham_4	256.1		wt_4	22.1	sham_4	20.6
25	wt_1	18.0146	sham_1	19.0014		wt_5	147.177	sham_5	200.931		wt_5	263.3	sham_5	283.33		wt_5	10.3	sham_5	0
30	wt_1	16.4245	sham_1	16.5831				sham_6	219.899				sham_6	251.27				sham_6	21.93
35	wt_1	11.4337	sham_1	19.0051				sham_7	236.35				sham_7	270.27				sham_7	1.5
40	wt_1	10.5609	sham_1	13.7175				sham_8	181.916				sham_8	255.37				sham_8	10
45	wt_1	10.6117	sham_1	11.8278				sham_9	234.345				sham_9	285.1				sham_9	0
50	wt_1	9.87838	sham_1	7.85171				sham_10	148.69				sham_10	262.57				sham_10	9.07
55	wt_1	13.1324	sham_1	10.7579				sham_11	165.247				sham_11	232.5				sham_11	40.7
60	wt_1	10.4091	sham_1	14.1151
5	wt_2	21.973	sham_2	24.4646
10	wt_2	18.1769	sham_2	24.5618
15	wt_2	17.0728	sham_2	24.8462
20	wt_2	14.9607	sham_2	23.4238
25	wt_2	14.8497	sham_2	20.9334
30	wt_2	11.507	sham_2	21.5836
35	wt_2	12.7423	sham_2	27.4345
40	wt_2	13.4013	sham_2	21.6896
45	wt_2	12.9668	sham_2	24.9879
50	wt_2	10.7797	sham_2	20.3348
55	wt_2	10.1776	sham_2	23.7025
60	wt_2	9.43889	sham_2	20.4556
5	wt_3	22.8616	sham_3	31.5531
10	wt_3	23.9325	sham_3	20.7051
15	wt_3	22.2783	sham_3	20.3342
20	wt_3	23.548	sham_3	20.5903
25	wt_3	26.8678	sham_3	17.7612
30	wt_3	21.028	sham_3	21.5524
35	wt_3	20.5481	sham_3	19.1967
40	wt_3	18.9001	sham_3	21.872
45	wt_3	17.4128	sham_3	19.3679
50	wt_3	11.5701	sham_3	19.1091
55	wt_3	17.654	sham_3	16.098
60	wt_3	15.8228	sham_3	20.2499
5	wt_4	23.2635	sham_4	23.3939
10	wt_4	18.4328	sham_4	17.1425
15	wt_4	17.1462	sham_4	14.5197
20	wt_4	16.2052	sham_4	17.7442
25	wt_4	21.3285	sham_4	14.0534
30	wt_4	22.1631	sham_4	15.4557
35	wt_4	23.1841	sham_4	14.5269
40	wt_4	21.5504	sham_4	14.9721
45	wt_4	19.1272	sham_4	18.3045
50	wt_4	21.6964	sham_4	15.9752
55	wt_4	19.1928	sham_4	9.97933
60	wt_4	13.4278	sham_4	9.12421
5	wt_5	22.1759	sham_5	19.5076
10	wt_5	15.7695	sham_5	17.6468
15	wt_5	15.0866	sham_5	15.2565
20	wt_5	13.4241	sham_5	15.6811
25	wt_5	8.9558	sham_5	13.1516
30	wt_5	14.1777	sham_5	13.7561
35	wt_5	12.8186	sham_5	18.2402
40	wt_5	11.3767	sham_5	14.8649
45	wt_5	6.53114	sham_5	19.3467
50	wt_5	10.4944	sham_5	19.8248
55	wt_5	6.7179	sham_5	19.611
60	wt_5	9.64828	sham_5	14.0431
5			sham_6	32.4085
10			sham_6	23.7757
15			sham_6	17.7349
20			sham_6	24.2735
25			sham_6	17.7925
30			sham_6	17.0791
35			sham_6	16.1227
40			sham_6	16.6033
45			sham_6	14.6138
50			sham_6	15.12
55			sham_6	11.457
60			sham_6	12.9187
5			sham_7	24.2267
10			sham_7	21.7327
15			sham_7	16.133
20			sham_7	14.5815
25			sham_7	20.2479
30			sham_7	20.3086
35			sham_7	20.3651
40			sham_7	21.6535
45			sham_7	21.0716
50			sham_7	17.6637
55			sham_7	20.2372
60			sham_7	18.1283
5			sham_8	24.0792
10			sham_8	15.9246
15			sham_8	15.8998
20			sham_8	14.6631
25			sham_8	15.7799
30			sham_8	17.4298
35			sham_8	16.6873
40			sham_8	16.643
45			sham_8	12.0139
50			sham_8	12.8366
55			sham_8	16.3288
60			sham_8	3.62934
5			sham_9	21.1725
10			sham_9	20.4416
15			sham_9	17.8503
20			sham_9	22.4355
25			sham_9	24.1456
30			sham_9	24.7003
35			sham_9	17.6617
40			sham_9	18.7931
45			sham_9	16.4517
50			sham_9	19.7918
55			sham_9	17.2167
60			sham_9	13.6843
5			sham_10	21.3481
10			sham_10	17.6121
15			sham_10	9.71616
20			sham_10	14.9447
25			sham_10	10.9528
30			sham_10	9.79556
35			sham_10	11.9175
40			sham_10	9.91516
45			sham_10	10.1873
50			sham_10	12.9592
55			sham_10	9.65985
60			sham_10	9.68199
5			sham_11	23.4469
10			sham_11	19.4702
15			sham_11	18.0836
20			sham_11	18.3999
25			sham_11	14.4822
30			sham_11	10.576
35			sham_11	9.20739
40			sham_11	10.2326
45			sham_11	8.27863
50			sham_11	16.3016
55			sham_11	9.5216
60			sham_11	7.24593

## Sheet: Supp. Fig. 4
Supp. Fig. 4b
DSE - EPSCs
Vehicle			AM-251
subject	pA (bs)	pA (DSE)	subject	pA (bs)	pA (DSE)
veh_1	132	65	am_1	161	154
veh_2	98	55	am_2	130	131
veh_3	82	50	am_3	116	121
veh_4	69	31	am_4	105	113
			am_5	90	93
			am_6	86	87
			am_7	69	68
			am_8	53	51
			am_9	39	38
			am_10	32	34

## Sheet: Supp. Fig. 6
Supp. Fig. 6a							Supp. Fig. 6b							Supp. Fig. 6c							Supp. Fig. 6d
VTO (cued) latency							VTO (cued) rewards							VTO (cued) omissions							VTO (cued) inactive presses
WT		SHAM		DGLa cKO			WT		SHAM		DGLa cKO			WT		SHAM		DGLa cKO			WT		SHAM		DGLa cKO
sec	sex	sec	sex	sec	sex		sec	sex	sec	sex	sec	sex		sec	sex	sec	sex	sec	sex		sec	sex	sec	sex	sec	sex
0.6176	male	4.65424	male	3.94405	male		68	male	4.65424	male	3.94405	male		0	male	0	male	0	male		0	male	0	male	0	male
2.2132	male	2.585	male	4.539	male		64	male	2.585	male	4.539	male		0	male	0	male	0	male		0	male	0	male	32	male
1.6776	male	1.49667	male	11.6514	male		67	male	1.49667	male	11.6514	male		0	male	2	male	0	male		2	male	1	male	15	male
1.9534	male	0.876667	male	7.95679	male		59	male	0.876667	male	7.95679	male		0	male	0	male	0	male		23	male	7	male	29	male
1.67098	male	0.996364	female	4.5722	female		56	male	0.996364	female	4.5722	female		0	male	0	female	0	female		14	male	0	female	37	female
2.06805	female	5.84667	female	6.55727	female		61	female	5.84667	female	6.55727	female		0	female	1	female	4	female		5	female	4	female	5	female
1.05835	female			28.3577	female		60	female			28.3577	female		1	female			1	female		54	female			8	female
1.1486	female			4.3086	female		70	female			4.3086	female		0	female			0	female		0	female			1	female
1.2063	female			37.625	female		81	female			37.625	female		0	female			1	female		5	female			0	female
Supp. Fig. 6g			Supp. Fig. 6h
VTO cue-evoked DA AUC x Latency			VTO rew-evoked DA AUC x Latency
Latency (s)	Δ[DA] AUC		Latency (s)	Δ[DA] AUC
2.694	0.102		2.694	0.2041
3.1214	0.2548		3.1214	-0.2255
1.8015	0.1134		1.8015	0.128
4.6083	0.2477		4.6083	0.0756
14.8167	0.4103		14.8167	0.0562
8.1304	0.1113		8.1304	-0.1124
1.7877	0.2782		1.7877	0.0952
2.7885	0.0281		2.7885	0.3381
4.0293	0.4172		4.0293	0.626
1.3449	0.1325		1.3449	0.3021
2.1167	0.6358		2.1167	-0.0969
1.5537	0.1296		1.5537	0.0497
8.0549	0.3451		8.0549	-0.1198
6.6839	0.3639		6.6839	-0.00823
4.1361	0.2292		4.1361	-0.0585
2.1167	0.348		2.1167	0.1215
4.2552	0.1792		4.2552	0.3847
3.2731	0.4172		3.2731	0.12
0.6176	0.1281		0.6176	-0.0141
2.2132	0.6358		2.2132	-0.0969
1.6776	0.1296		1.6776	0.0497
1.9534	0.2722		1.9534	0.1001
1.67098	0.3639		1.67098	-0.00823
2.06805	0.2292		2.06805	-0.0585
1.05835	0.6567		1.05835	-0.2027
1.1486	0.1224		1.1486	0.038
1.2063	0.4172		1.2063	0.0416
5.4866	0.1224		5.4866	0.3029
3.1745	0.0736		3.1745	0.5804
10.2871	0.0281		10.2871	0.3381
7.6655	0.0269		7.6655	0.0853
8.3841	0.00819		8.3841	0.3397
35.2917	0.1365		35.2917	0.962
29.82	0.1472		29.82	0.3334
8.094	-0.0163		8.094	0.3273
35.2917	-0.0469		35.2917	0.962
2.4015	0.1004		2.4015	0.2634
3.09575	0.0736		3.09575	0.5804
13.3514	0.1792		13.3514	0.3847
8.24808	0.0269		8.24808	0.0853
12.0371	0.00819		12.0371	0.3397
7.213	0.1625		7.213	0.5346
12.1532	-0.0524		12.1532	0.0483
21.5172	-0.0163		21.5172	0.67795
32.0834	0.0893		32.0834	0.5346
3.94405	0.1004		3.94405	0.2634
4.539	-0.0157		4.539	0.357
11.6514	0.1224		11.6514	0.3381
7.95679	-0.0265		7.95679	0.0135
4.5722	0.0965		4.5722	0.0348
6.55727	0.1625		6.55727	0.5168
28.3577	-0.0524		28.3577	0.0486
4.3086	-0.0163		4.3086	0.50263
37.625	0.0156		37.625	0.5168
